# Supplementary material for: Visible-light-driven photocatalytic bacterial inactivation and the mechanism of zinc oxysulfide under LED light irradiation
Source: Royal Society of Chemistry journal article supplement (doi:10.1039/c5ta08044d), 2015-11-30
Supplement: c5ta08044d1.pdf [file c5ta08044d1.pdf]

## Supporting Information

### Visible-light-driven photocatalytic bacterial inactivation and mechanism of zinc oxysulfide under LED light irradiation

Dan Wu <sup>a</sup>, Wei Wang <sup>a,b,\*</sup>, Tsz Wai Ng <sup>a</sup>, Guocheng Huang <sup>a</sup>, Dehua Xia <sup>a</sup>, Ho Yin Yip <sup>a</sup>,  
Hung Kay Lee <sup>c</sup>, Guiying Li<sup>d</sup>, Taicheng An<sup>d</sup> and Po Keung Wong <sup>a,\*</sup>

<sup>a</sup> School of Life Sciences and <sup>c</sup> Department of Chemistry, The Chinese University of Hong Kong, Shatin, NT, Hong Kong SAR, China

<sup>b</sup> State Key Laboratory of Material Processing and Die & Mould Technology, Huazhong University of Science and Technology, Wuhan 430074, China

<sup>d</sup> Guangzhou Institute of Geochemistry, Chinese Academy of Sciences, Guangzhou 510640, China

\*Corresponding authors:

W. Wang: Tel: +86-87541540, Fax: +86-87541540, E-mail: [weiwang@hust.edu.cn](mailto:weiwang@hust.edu.cn);

P.K. Wong: Tel: +852-39436383, Fax: +852-26035767, E-mail: [pkwong@cuhk.edu.hk](mailto:pkwong@cuhk.edu.hk).

## Experimental Section

### *H<sub>2</sub>O<sub>2</sub> measurement*

The amount of H<sub>2</sub>O<sub>2</sub> produced by ZnO<sub>0.6</sub>S<sub>0.4</sub> during the photocatalytic inactivation process was measured by a highly sensitive fluorometric method. Briefly, 0.4 mL of the samples, 0.1 mL of coumarin (0.5 mM), and 0.1 mL of FeSO<sub>4</sub> (0.25 mM) were added into 0.4 mL of acitrate buffer (pH 3) with further standing at room temperature for 10 min. Then the mixture was measured at an emission wavelength of 456 nm with an excitation wavelength of 346 nm with an Infinite® M200 microplate reader (Tecan, Mannedorf, Switzerland). The concentration of produced H<sub>2</sub>O<sub>2</sub> was calculated based on the standard as the same procedure using pure H<sub>2</sub>O<sub>2</sub> as a reference.

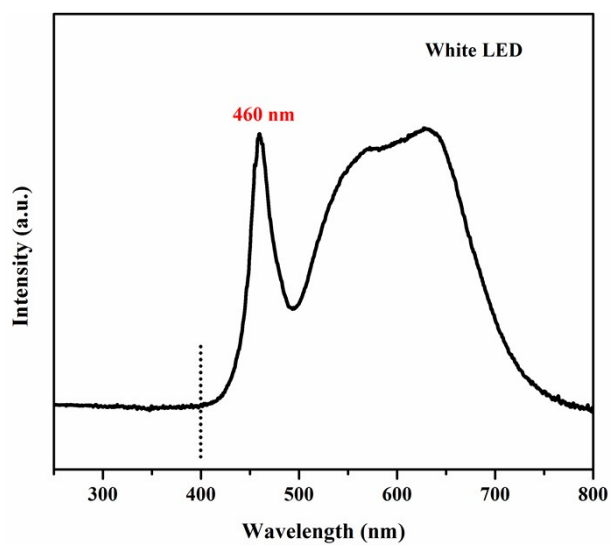

**Fig. S1.** Light spectrum of white LED lamp.

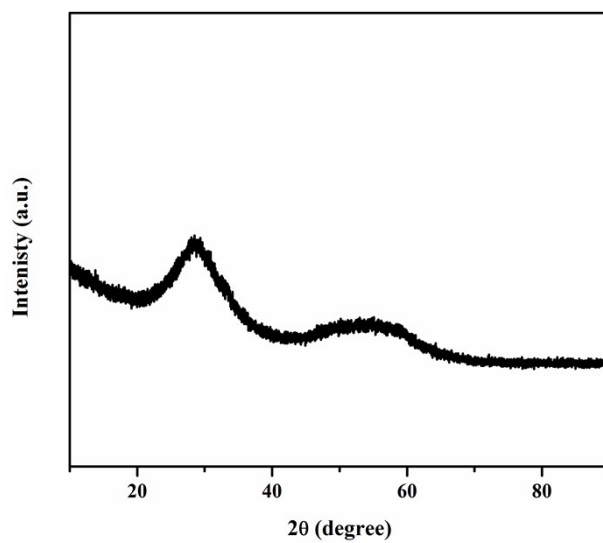

**Fig. S2.** XRD pattern of  $\text{ZnO}_{0.6}\text{S}_{0.4}$  precursor before calcination.

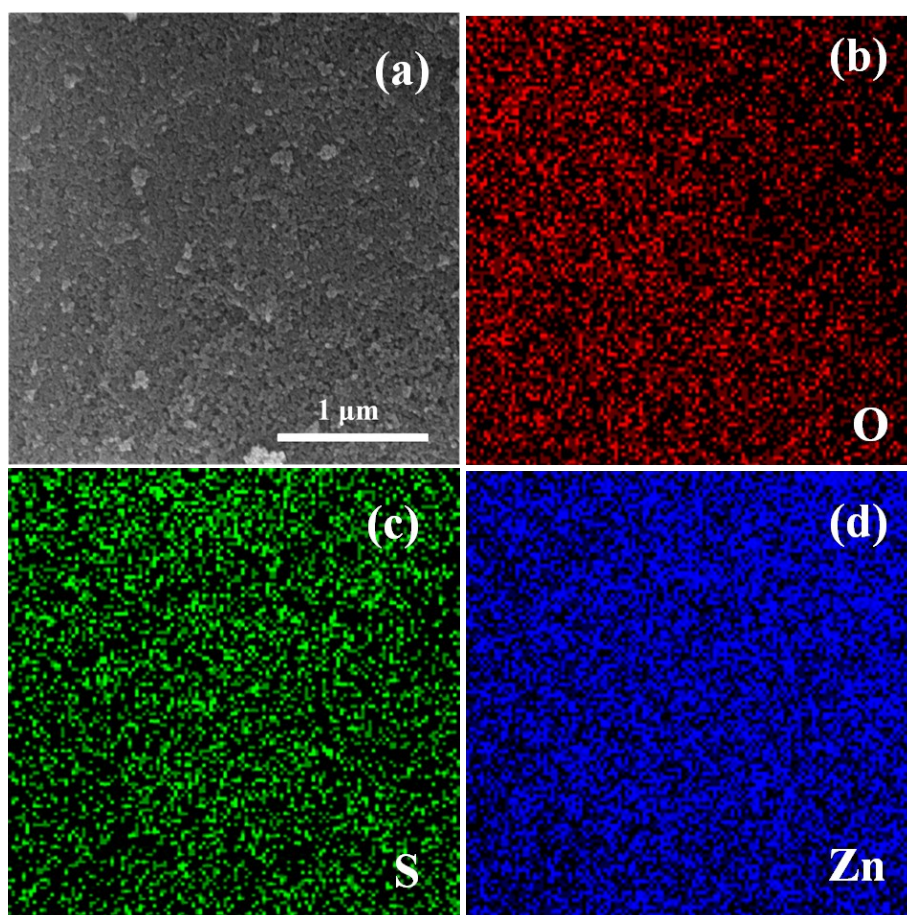

**Fig. S3.**(a) SEM image and corresponding EDX element mapping of (b) O, (c) S and (d) Zn of  $\text{ZnO}_{0.6}\text{S}_{0.4}$  nanoparticles.

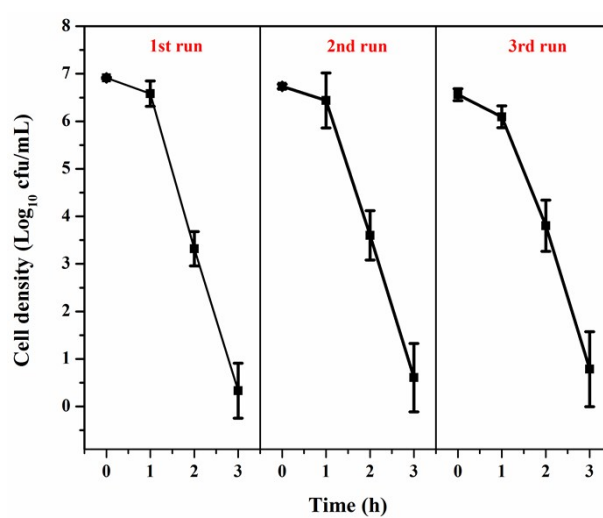

**Fig. S4.** Recycling test of photocatalytic bacterial inactivation for  $\text{ZnO}_{0.6}\text{S}_{0.4}$  nanoparticles.

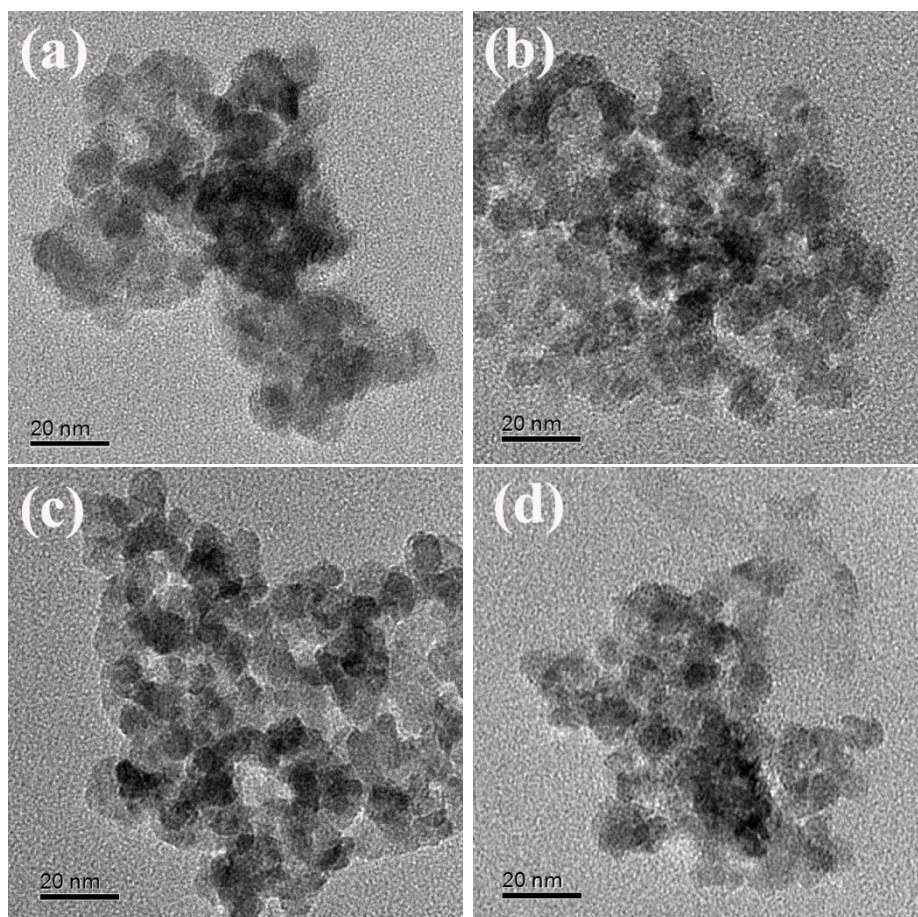

**Fig. S5.** TEM images of the  $\text{ZnO}_{0.6}\text{S}_{0.4}$  nanoparticles after photocatalytic recycling test for (a) 0, (b) 1<sup>st</sup> (c) 2<sup>nd</sup> and (d) 3<sup>rd</sup> run.

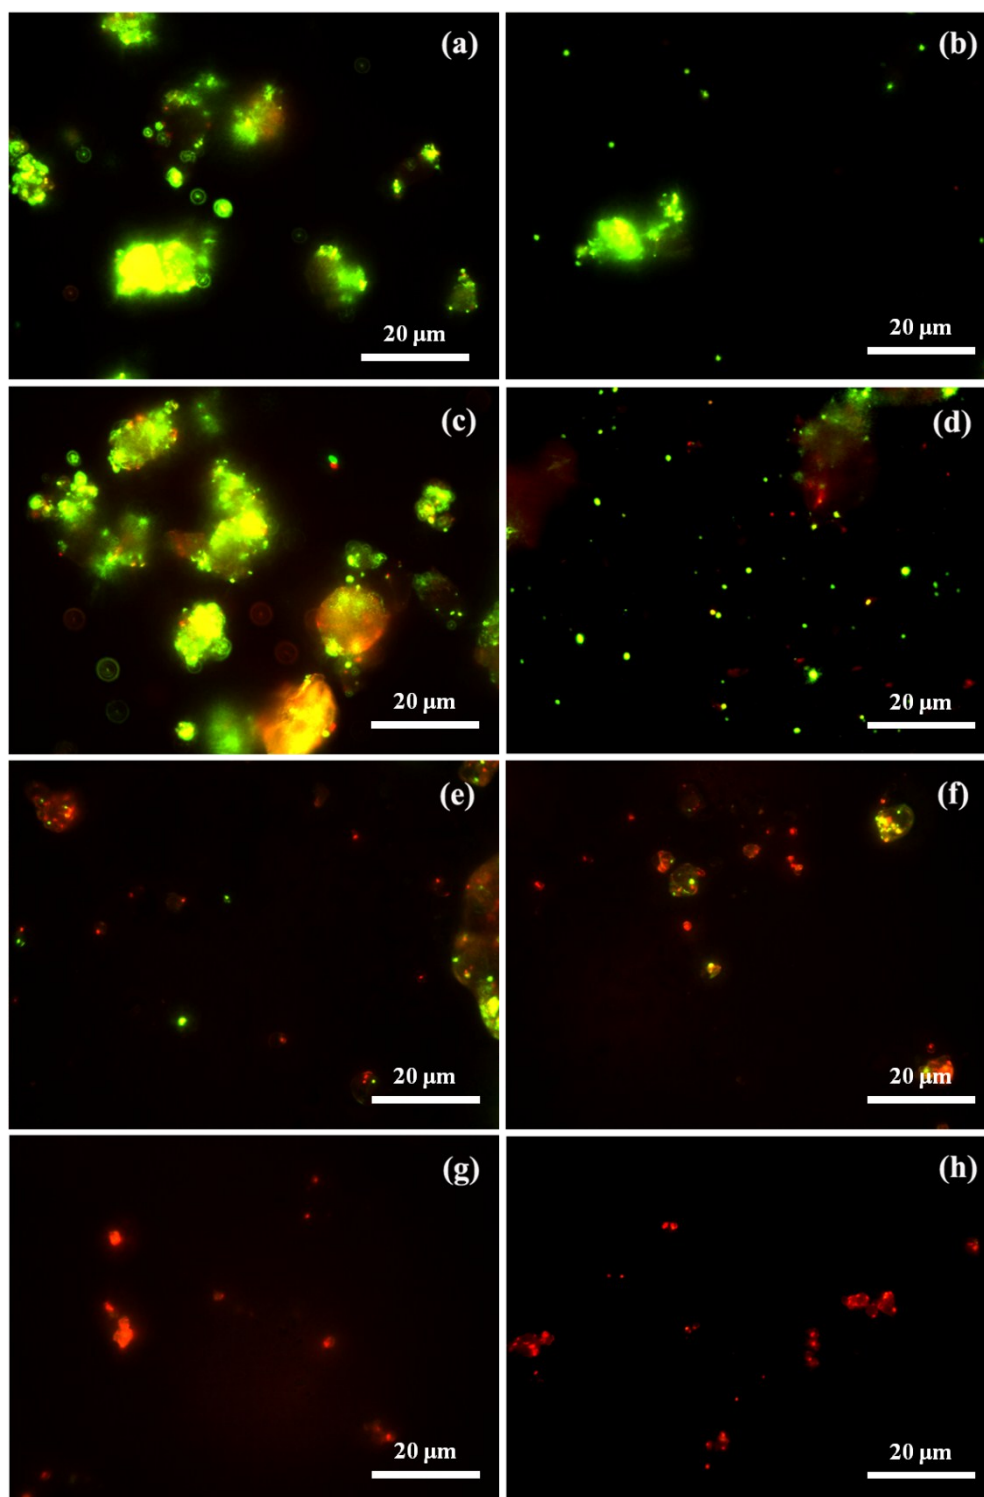

**Fig. S6** Fluorescence microscopic images of *E. coli* K-12 photocatalytically treated by  $\text{ZnO}_{0.6}\text{S}_{0.4}$  nanoparticles under visible LED irradiation for (a) and (b) 0, (c) and (d) 1, (e) and (f) 2, and (g) and (h) 3 h.



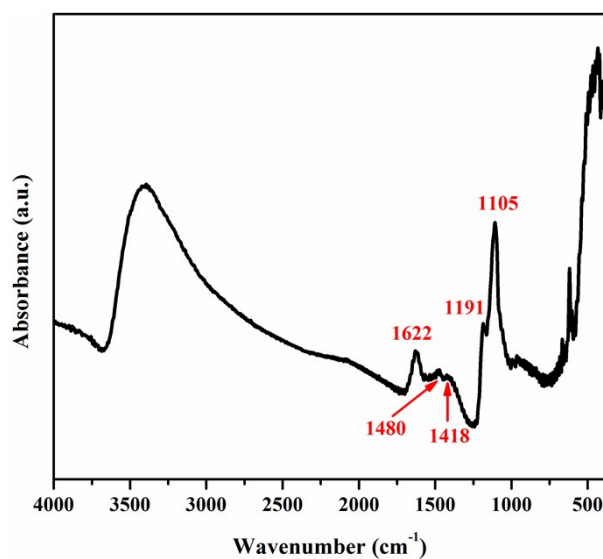

**Fig. S7.** FTIR spectrum of ZnO<sub>0.6</sub>S<sub>0.4</sub> nanoparticles.

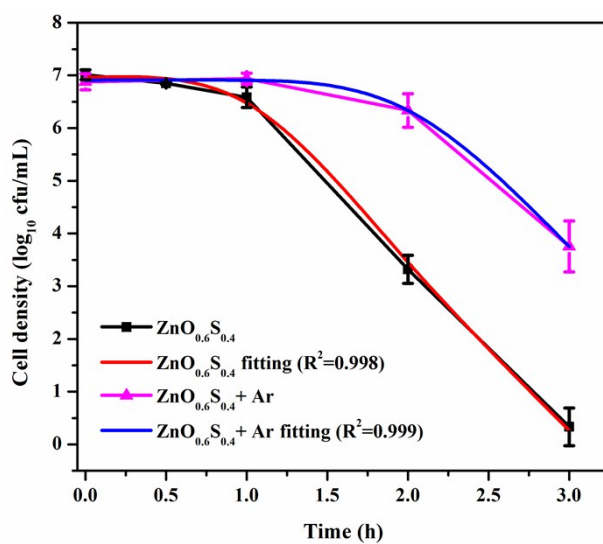

**Fig. S8.** Photocatalytic bacterial inactivation efficiency of ZnO<sub>0.6</sub>S<sub>0.4</sub> nanoparticles fitted with the “shoulder + log-linear” model.

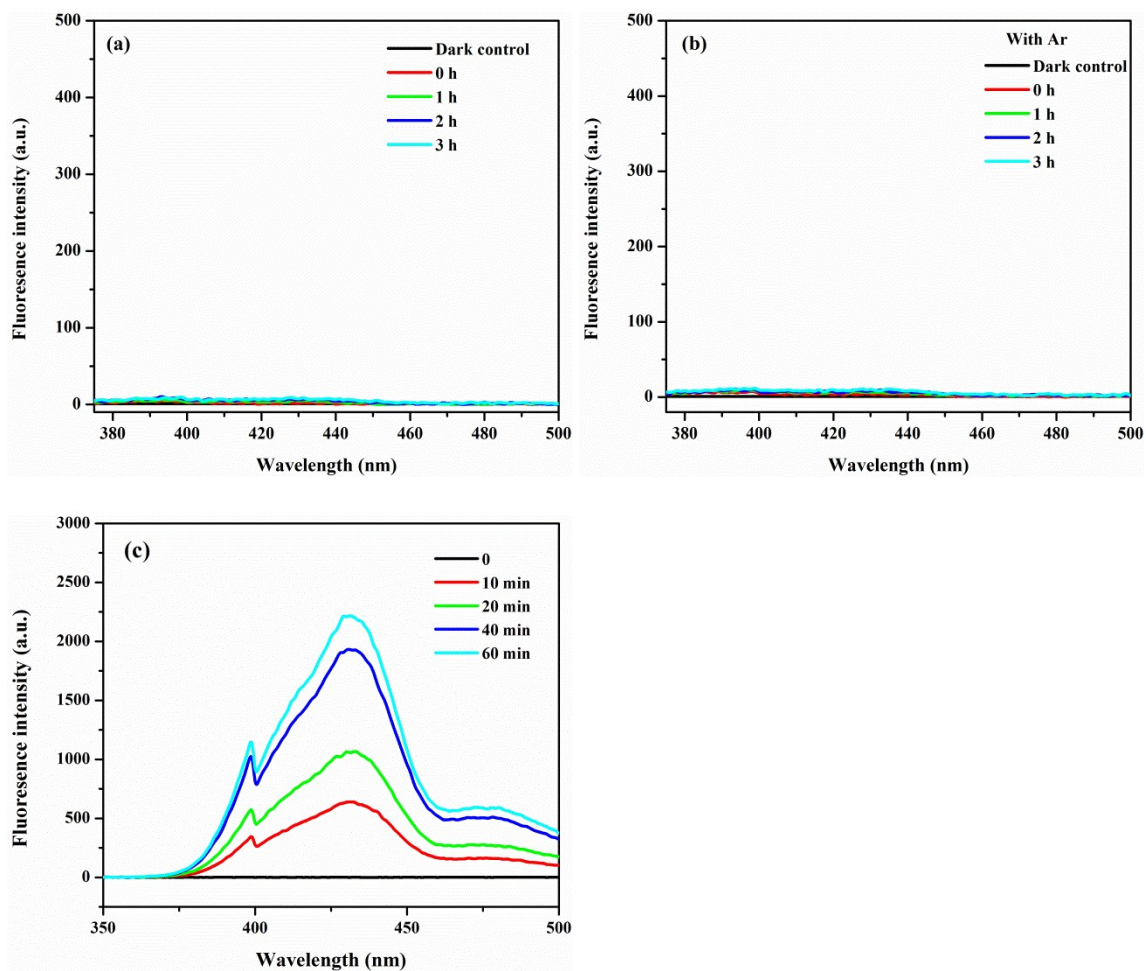

**Fig. S9.** Fluorescence spectra of terephthalic acid during the photocatalytic treatment of  $\text{ZnO}_{0.6}\text{S}_{0.4}$  nanoparticles under visible LED irradiation (a) without and (b) with Ar purging; and for (c)  $\text{TiO}_2$ -P25 under UV irradiation for a reference.
